# Supplementary material
Source: publisher figshare collection journal article supplement (https://acs.figshare.com/ndownloader/files/5769198)
Supplement: Supplementary file 1 [file 5769198]

Unpublished data  
for reference No.21

Modification of Neohesperidin Dihydrochalcone(NHDC)  
by *Bacillus stearothermophilus* Maltogenic Amylase

J.S.Cho, M.J.Kim, K.H.Park

ABSTRACT

Neohesperidin Dihydrochalcone (NHDC), a sweet compound in grape fruits, was modified to a series of its oligoglycosides by transglycosylation activity of maltogenic amylase from *Bacillus stearothermophilus* (BSMA) with NHDC as an acceptor and maltose as a donor for increasing solubility of NHDC.

Among the several transfer products, maltosyl-NHDC was major transglycosylation product, which was determined by Thin Layer Chromatography (TLC) analysis. Maltosyl-NHDC was purified using sephadex LH-20 lipophylic gel filtration chromatography and TLC. The structure of the purified compound was determined to be maltosyl- $\alpha$ -(1,6)-neohesperidin dihydrochalcone by MALDI-TOF/MS and  $^1\text{H}$ - and  $^{13}\text{C}$ -NMR. And maltosyl-NHDC showed about 700 times higher solubility and about 7 times less sweetness than that of NHDC.

## OBJECTIVES

- Modification of Neohesperidin Dihydrochalcone by transglycosylation reaction of maltogenic amylase (BSMA).
- Improvement of physicochemical properties of neohesperidin Dihydrochalcone; increase in solubility.

### Neohesperidin Dihydrochalcone(NHDC)

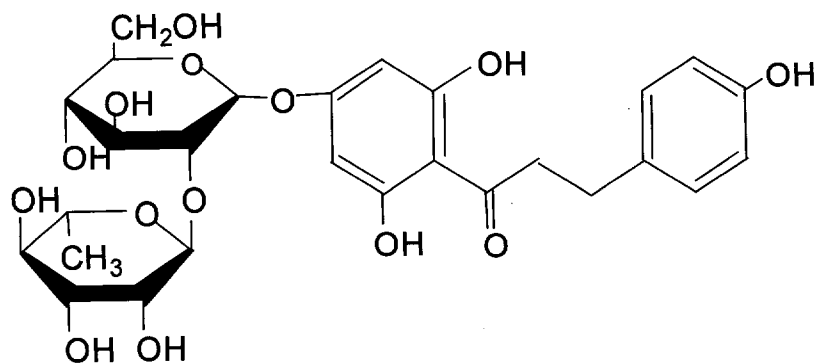

- (1-[4-[[2-O-(6-deoxy- $\alpha$ -L-mannopyranosyl- $\beta$ -D-glucopyranosyl]oxy]-2,6-dihydroxyphenyl]-3-(3-hydroxy-4-methoxyphenyl)-1-propanone)
- A kind of flavonoid compound in grape fruits
- 1000 to 1500 times sweeter than sucrose
- 2 times sweeter than saccharin
- Low solubility
- Bitterness aftertaste
- Artificial sweetner : chewing gum, dentifrice etc.

## Transglycosylation of NHDC by BSMA

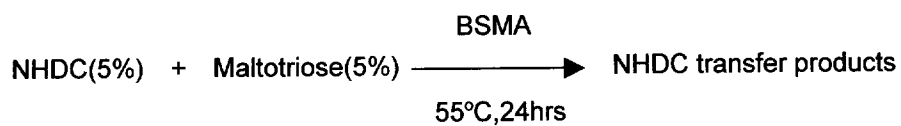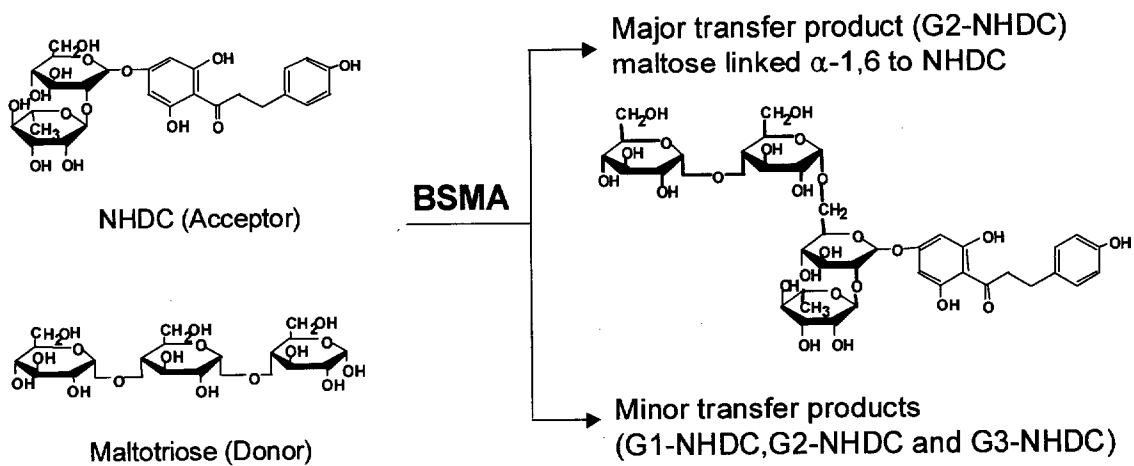

### TLC analysis of transfer products

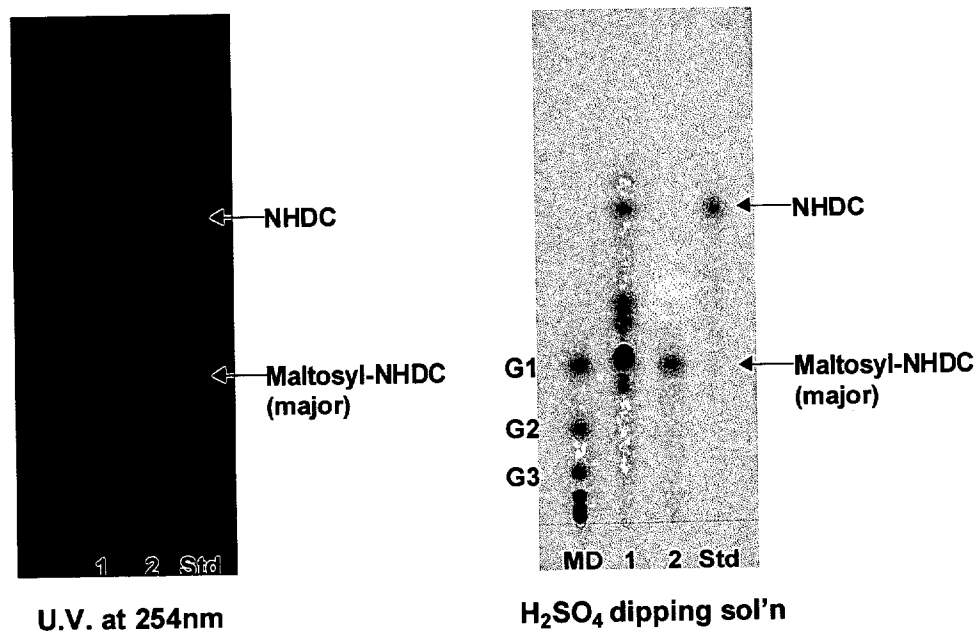

Lane MD : Maltodextrin standard, Lane 1: Transfer products

Lane 2 : Purified maltosyl-NHDC, Lane Std : NHDC

**Molecular weight of purified maltosyl-NHDC  
using MALDI-TOF MS**

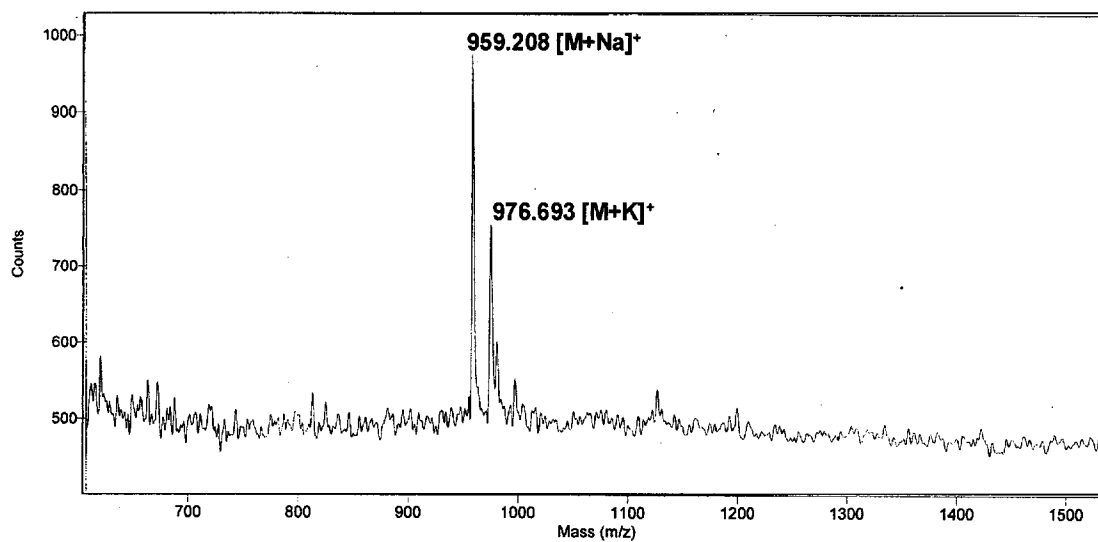

### <sup>13</sup>C-NMR spectra of NHDC and maltosyl-NHDC

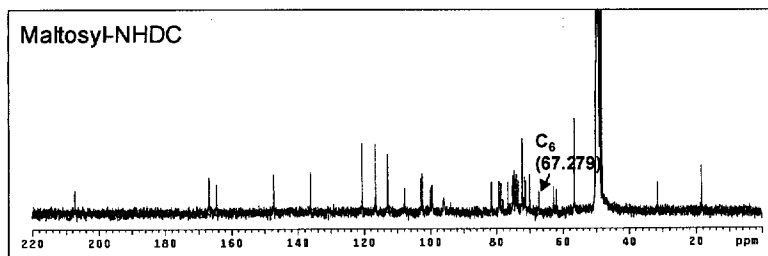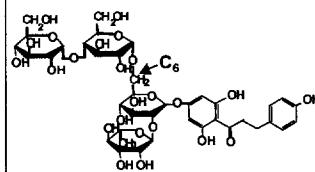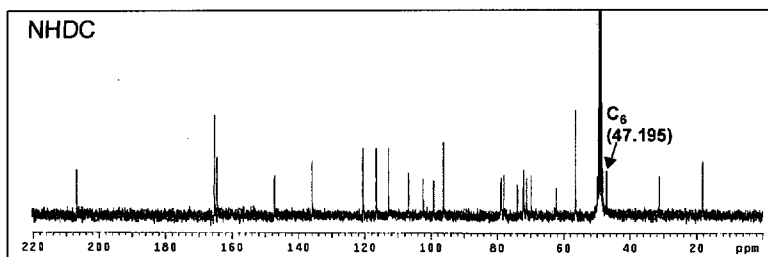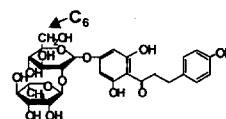

**Solubility of NHDC and 6-G2-NHDC**

| Compound  | Solubility | Relative solubility |
|-----------|------------|---------------------|
| NHDC      | 1.36mM     | 1                   |
| 6-G2-NHDC | 977mM      | 718.4               |



**Threshold value and relative sweetness  
of NHDC and 6-G2-NHDC**

| Compound  | Taste      | Threshold value       | Relative solubility |
|-----------|------------|-----------------------|---------------------|
| NHDC      | sweet      | $2.04 \times 10^{-3}$ | 100                 |
| 6-G2-NHDC | less sweet | $1.5 \times 10^{-2}$  | 14                  |

## CONCLUSIONS

- Several transfer products of NHDC were produced by transglycosylation activity of BSMA.
- Major transfer product was identified as a maltosyl-NHDC by TLC and MALDI-TOF/MS.
- The linkage of maltose to NHDC in the maltosyl-NHDC was determined to be  $\alpha$ -1,6 by  $^1\text{H}$ - and  $^{13}\text{C}$ - NMR.
- Maltosyl-NHDC showed about 700 times higher solubility and about 7 times less sweetness than that of NHDC.

## REFERENCES

Horowitz, R. M. and Gentili, B. Dihydrochalcone derivatives and their use as sweetening agents. *J. Agr. Food. Chem.* **17**(4):696-700. 1963

Inglett, G. E., Krbechek, L., Dowling, B. and Wagner, R. Dihydrochalcone sweeteners-sensory and stability evaluation. *J. Food Sci.* **34**:101-103. 1969

Sachiko, E., Kiyotoshi, N., Naoko, S., Ryuta, N., Yoshihiro, T. and Shintaro, K. Preparation and taste of certain glycosides of flavanones and of dihydrochalcone. *Biosci. Biotech. Biochem.* **58**(8):1479-1485. 1994

Kometani, T., Nishimura, T., Nakae, T. and Okada, S. Synthesis of neohesperidin glycosides and naringin glycosides by cyclodextrin glucanotransferase from an alkalophilic *Bacillus* species. *Biosci. Biotech. Biochem.* **60**:645-649. 1996

Lee, S. J. Modification of naringin to naringin glycoside by transglycosylation of maltogenic amylase from *Bacillus stearothermophilus*(BSMA). Master Thesis. Seoul Nat'l Univ. 1999
